# Supplementary material for: Electrical response of organic molecule supported preformed and in situ formed antimony sulfide nanoparticles under frequency conditions
Source: Royal Society of Chemistry journal article supplement (doi:10.1039/d1na00361e), 2021-01-01
Supplement: d1na00361e1.pdf [file d1na00361e1.pdf]

## Supplementary information

### Electrical response of organic molecule supported *preformed and in-situ formed* antimony sulfide nanoparticles under frequency domain

Sarit K Ghosh, Venkata Perla, Kaushik Mallick

Department of Chemical Sciences, University of Johannesburg, P.O. Box: 524, Auckland Park, 2006, South Africa.

Figure: S1

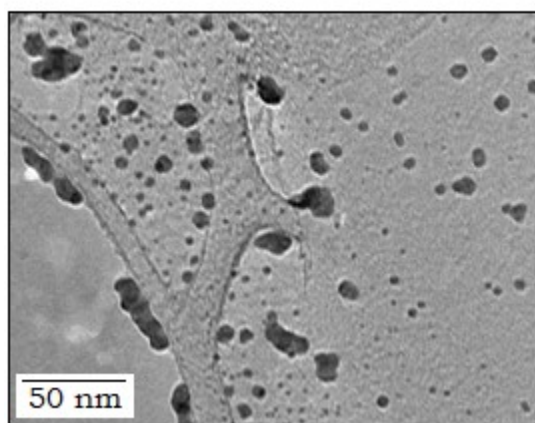

**Figure S1:** Formation of antimony sulfide nanoparticles after the addition of sodium sulfide to the antimony-aniline complex, film form (sample was collected at the end of the experiment).

Figure: S2

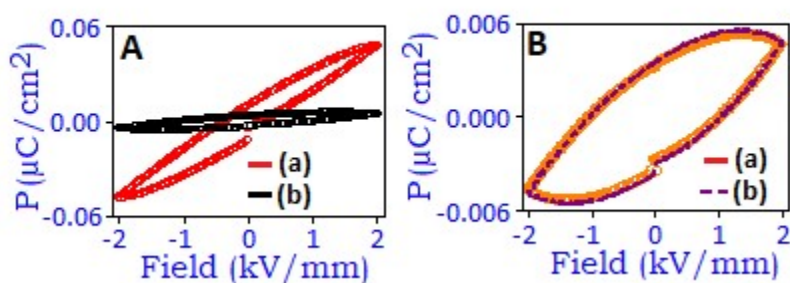

**Figure S2:** (A) Comparative of polarization hysteresis pattern of preformed antimony sulfide nanoparticles (a) and antimony-aniline complex (b) at 10 Hz. (B) Polarization hysteresis of antimony-aniline complex (a) and antimony-aniline complex in presence of methanol (b).

**Figure: S3**

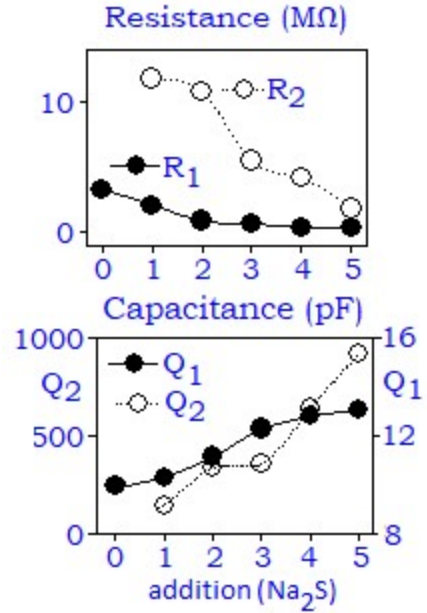

**Figure S3:** Variation of the resistance ( $R_1$  and  $R_2$ ) and capacitance ( $Q_1$  and  $Q_2$ ) components of *in-situ* formed antimony sulfide with respect to the addition of  $\text{Na}_2\text{S}$ .

**Table S1:** Fitting parameters extracted from the equivalent circuit model.

| Addition ( $\text{Na}_2\text{S}$ ) | $R_1$ ( $\Omega$ ) | $Q_1$ ( $\text{pF}\cdot\text{s}^{\alpha-1}$ ) | $\alpha_1$ | $R_2$ ( $\Omega$ )  | $Q_2$ ( $\text{pF}\cdot\text{s}^{\alpha-1}$ ) | $\alpha_2$ | $W_d$ ( $\Omega$ ) |
|------------------------------------|--------------------|-----------------------------------------------|------------|---------------------|-----------------------------------------------|------------|--------------------|
| 0                                  | $3.6 \times 10^6$  | 10.20                                         | 0.92       | -                   | -                                             | -          | -                  |
| 1                                  | $2.12 \times 10^6$ | 10.26                                         | 0.96       | $11.78 \times 10^6$ | 143.2                                         | 0.83       | $14.5 \times 10^6$ |
| 2                                  | $0.91 \times 10^6$ | 11.13                                         | 0.96       | $10.79 \times 10^6$ | 334.1                                         | 0.61       | $13.1 \times 10^6$ |
| 3                                  | $0.67 \times 10^6$ | 12.30                                         | 0.97       | $5.51 \times 10^6$  | 357.5                                         | 0.62       | $11.7 \times 10^6$ |
| 4                                  | $0.42 \times 10^6$ | 12.80                                         | 0.97       | $4.21 \times 10^6$  | 638.2                                         | 0.58       | $4.65 \times 10^6$ |
| 5                                  | $0.37 \times 10^6$ | 13.10                                         | 0.96       | $1.85 \times 10^6$  | 921.1                                         | 0.57       | $1.06 \times 10^6$ |
